# Supplementary material for: Plasmonic surface enhancement of dual fluorescence and phosphorescence emission from organic semiconductors: effect of exchange gap and spin–orbit coupling
Source: Royal Society of Chemistry journal article supplement (doi:10.1039/c2cc31843a), 2012-01-01
Supplement: c2cc31843a.pdf [file c2cc31843a.pdf]

**Plasmonic surface enhancement of dual fluorescence and  
phosphorescence emission from organic semiconductors: effect of  
exchange gap and spin-orbit coupling**

Debangshu Chaudhuri,<sup>\*a,b</sup> Dongbo Li,<sup>a</sup> Eva Sigmund,<sup>c</sup> Sigurd Höger<sup>c</sup> and John M.  
Lupton<sup>a</sup>

<sup>a</sup> Department of Physics and Astronomy, University of Utah, Salt Lake City, UT 84112,  
USA.

<sup>b</sup> Department of Chemical Sciences, Indian Institute of Science Education and Research  
Kolkata, Mohanpur 741252, India. E-mail: dchaudhuri@iiserkol.ac.in

<sup>c</sup> Kekulé-Institut für Organische Chemie und Biochemie der Universität Bonn, Gerhard-  
Domagk-Str. 1, 53121 Bonn, Germany.

# Supporting Information

## Sample Preparation

### 1. Silver nanoparticle film

Silver nanoparticle films were prepared by Tollens silver mirror reaction, as described in Ref. 1. For a reaction time of 45-150 sec, the morphology of the silver films was rough. When restricted to these reaction times, the resultant silver film exhibited similar degree of rate enhancement.

### 2. Organic fluorophore film

The compounds were co-dissolved with polystyrene (Aldrich, average M. W. 82000) in toluene. The concentration of polystyrene in toluene was kept at 10 g/L. The films were coated on quartz and Tollens substrates (16×8 mm<sup>2</sup>) using the following spin-coating parameters: volume of solution = 30 μL, speed = 2 krpm and time = 60 s. In the finally dried organic film, the compounds are homogenously dispersed at ~1% wt. ratio in polystyrene.

### Fluorescence and Phosphorescence Lifetime

Time-resolved fluorescence measurements were performed using a Hamamatsu streak camera system with up to ~4 ps time resolution. Samples were excited using a 140 fs, 80 MHz repetition rate, frequency doubled Ti:Sapphire laser. During measurements, the samples were placed in dynamic vacuum of ~10<sup>-6</sup> mbar.

Phosphorescence lifetimes were recorded in a cold-finger closed-cycle helium cryostat using a pulsed solid-state laser at 355 nm and an Andor intensified gated CCD camera with a time resolution of ~1 ns.

### Absorbance Spectra

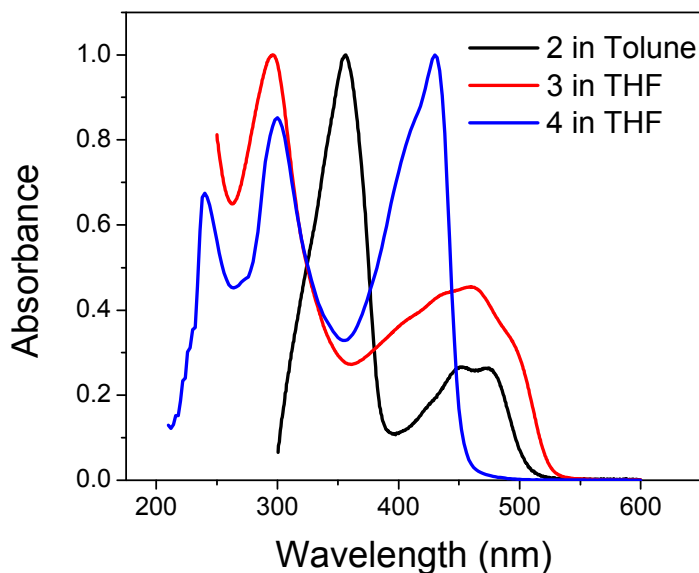

Fig. 1. Solution phase uv-vis absorption spectra of compounds 2, 3 and 4 at room temperature

### *Singlet-Triplet Energy Difference*

The singlet and triplet energy levels are split by the exchange gap. For rigid-rod conjugated polymers, the exchange gap was known to be universally  $0.7 \pm 0.1$  eV.<sup>2</sup> However, we recently showed that by careful chemical design it is possible to achieve different extents of delocalization of the singlet and triplet excited states, thereby achieving wide tunability in their energy difference.<sup>3</sup> Compounds 3 and 4 are such copolymers where the exchange gap could be tuned to much lower values (0.017 and 0.4 eV, respectively). It is, of course, conceivable that triplet emission actually occurs from a higher lying (hot) triplet state and that Kasha's law is violated in the triplet manifold. At present, we do not have a way of proving this. As commented on in Ref. 2, we did not observe any long-lived triplet features at lower energy, but, of course, lower-energy triplet transitions may be dark.

### *References*

1. N. J. Borys and J. M. Lupton, *J. Phys. Chem. C* 2011, **115**, 13645.
2. A. Koehler and D. Beljonne, *Adv. Funct. Mater.* 2004, **14**, 11.
3. D. Chaudhuri, H. Wettach, K. J. vanSchooten, S. Liu, E. Sigmund, S. Höger and J. M. Lupton, *Angew. Chem. Int. Ed.*, 2010, **49**, 7714.
